# Supplementary material
Source: PubMed Central journal article supplement (PMC9673995)
Supplement: NIHMS1842247-supplement-Supp_Fig_1.pdf [file NIHMS1842247-supplement-Supp_Fig_1.pdf]

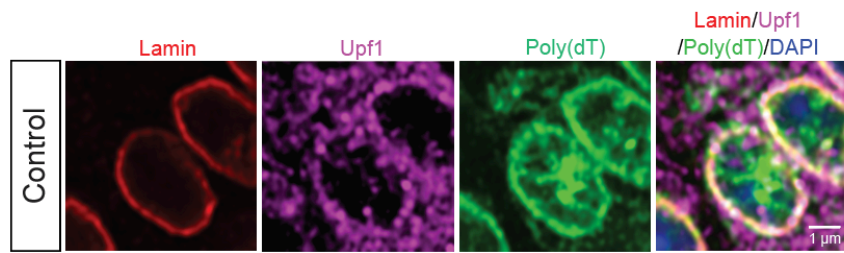

**Supplemental Figure 1 | Upf1 and polyA RNA are enriched at the nuclear envelope but are also present within the cytoplasm and nucleus of cells within the *Drosophila* brain. Images are an over-saturated version of images presented in Fig. 3.**
