# Supplementary material
Source: PubMed Central journal article supplement (PMC9673995)
Supplement: NIHMS1842247-supplement-Supp_Table_1.pdf [file NIHMS1842247-supplement-Supp_Table_1.pdf]

| Name                     | Full Genotype                                             | Insertion Chromosome | Stock # | Source                  |
|--------------------------|-----------------------------------------------------------|----------------------|---------|-------------------------|
| Upf1 <sup>RNAi</sup>     | y[1] v[1]; P{y[+t7.7] v[+t1.8]=TRiP.GL01485}attP2         | 3                    | 43144   | Bloomington (DRSC-TRiP) |
| Smg5 <sup>RNAi</sup>     | y[1] sc[*] v[1]; P{y[+t7.7] v[+t1.8]=TRiP.HMC05268}attP40 | 2                    | 62261   | Bloomington             |
| Upf1 <sup>OE</sup>       | w[*]; P{w[+mC]=UASp-GFP.Upf1}2                            | 2                    | 24623   | Bloomington             |
| Upf2 <sup>OE</sup>       | w[*]; P{w[+mC]=UAS-Upf2.A}3                               | 3                    | 60578   | Bloomington             |
| UAS-tau <sup>R406W</sup> | UAS-tau <sup>R406W</sup>                                  | 3                    |         | Mel Feany(Wittman)      |
| UAS-tau <sup>WT</sup>    | UAS-tau <sup>WT</sup>                                     | 3                    |         | Mel Feany(Wittman)      |
| UAS-SCA3                 | P{UAS-SCA3.fl-Q84.myc}7.2                                 | 3                    |         | Nancy Bonini(Warrick)   |

**Supplemental**

**Table 1 |** List of *Drosophila* lines including name referred in paper, full genotype, insertion chromosome, stock number and source.

Vienna (Vienna *Drosophila* Resource Center), Bloomington (Bloomington *Drosophila* Stock Center), and *Drosophila* RNAi Screening Center (DRSC) - Transgenic RNAi Project (TriP).
