# Supplementary material
Source: PubMed Central journal article supplement (PMC9673995)
Supplement: NIHMS1842247-supplement-Supp_Table_2.pdf [file NIHMS1842247-supplement-Supp_Table_2.pdf]

| Antibody          | Host   | Western   | IF    | Source                                   |
|-------------------|--------|-----------|-------|------------------------------------------|
| LaminDmO          | Rabbit |           | 1:200 | Paul Fisher (R836)                       |
| Puromycin [3RH11] | Mouse  |           | 1:50  | Kerafast, EQ0001                         |
| DIG               | Goat   |           | 1:200 | Abcam # ab76907                          |
| DIG               | Rabbit |           | 1:200 | Invitrogen #700772                       |
| DsRed             | Mouse  |           | 1:100 | Santa Cruz Biotechnology, Inc. Sc-390909 |
| cTau              | Mouse  | 1:100,000 |       | Dako # A0024                             |

**Supplemental Table 2** | Antibodies used in immunofluorescence (IF) and western blotting, including host, dilution factors, and sources.
