# Supplementary material
Source: PubMed Central journal article supplement (PMC9673995)
Supplement: NIHMS1842247-supplement-Supp_Table_3.pdf [file NIHMS1842247-supplement-Supp_Table_3.pdf]

| Gene   | Assay ID      |
|--------|---------------|
| Gadd45 | Dm01815710_s1 |
| Tra    | Dm01822927_g1 |
| Arc1   | Dm01823981_s1 |
| Upf1   | Dm01838133_g1 |
| Upf2   | Dm0833790_g1  |
| Upf3   | Dm01820182_g1 |
| Smg5   | Dm01791312_g1 |

**Supplemental Table 3** | Gene list of *Drosophila* mRNA targets and corresponding predesigned Taqman gene expression assays (Assay ID).
